# Supplementary material for: Solvent-free synthesis of polyhydroquinoline derivatives employing mesoporous vanadium ion doped titania nanoparticles as a robust heterogeneous catalyst via the Hantzsch reaction
Source: Royal Society of Chemistry journal article supplement (doi:10.1039/c6ra26664a), 2017-01-01
Supplement: c6ra26664a1.pdf [file c6ra26664a1.pdf]

## **Supplementary Data**

### **Solvent-free synthesis of polyhydroquinoline derivatives employed by mesoporous vanadium ion doped titania nanoparticles as robust heterogeneous catalyst *via* Hantzsch reaction**

G. B. Dharma Rao,<sup>a,b,\*</sup> S. Nagakalyan,<sup>b</sup> G. K. Prasad.<sup>a,\*</sup>

<sup>a</sup>*Discovery Division, Defence R. & D. Establishment, Jhansi Road, Gwalior – 474002 (M.P), India.*

<sup>b</sup>*Department of Chemistry, Kommuri Pratap Reddy Institute of Technology, Hyderabad - 501 301 (TS), India.*

*\*E-mail: gbdharmarao@gmail.com, gkprasad2001@yahoo.com.*

#### **Contents:**

|                                                         |               |
|---------------------------------------------------------|---------------|
| <b>General Experimental Information</b>                 | <b>S1-S2</b>  |
| <b>Characterization of V-TiO<sub>2</sub> NPs</b>        | <b>S2-S4</b>  |
| <b>Table 3. Synthesis of polyhydroquinolines (5a-u)</b> | <b>S4-S9</b>  |
| <b>Characterization of compounds</b>                    | <b>S9-S10</b> |

### General Experimental Information:

Reagents were obtained from commercial supplier and used without further purification. The  $^1\text{H}$  and  $^{13}\text{C}$  NMR spectra of the synthesized compounds were recorded at 400 MHz and 100 MHz respectively using Bruker AVANCE 400 MHz NMR spectrometer in  $\text{DMSO-d}_6$  and  $\text{CDCl}_3$  solvent and the chemical shifts were expressed in  $\delta$  (ppm) relative to TMS as internal standard and coupling constants ( $J$ ) in Hz. Spin multiplicities are described as s (singlet), t (triplet), q (quartet) and m (multiplet). TLC is performed using precoated aluminium sheets with silica gel 60 F<sub>254</sub>. XRD patterns were obtained in an X Pert Pro Diffractometer, Panalytical, Netherlands. SEM-EDAX measurements were done on a FEI instrument.  $\text{N}_2$  BET measurements were done on ASAP 2020 of Micrometrics, USA.

### *Synthesis of polyhydroquinoline derivatives via Hantzsch reaction*

To a mixture of methyl/ethyl acetoacetate (1.0 mmol), dimedone (1.0 mmol), arylaldehyde (1.0 mmol) and ammonium acetate (2.0 mmol), catalytic amount (2.0 mol%) of V-TiO<sub>2</sub> nanoparticle was added at room temperature under stirring. The reaction mixture was heated on oil bath at 80°C. The reaction advancement was monitored by TLC. After the completion of reaction, it was cooled to room temperature and the resultant reaction mixture was washed with brine and extracted with ethyl acetate. The catalyst was separated out by filtration from the extraction mixture. Organic layer was separated, dried over anhydrous sodium sulfate and concentrated under reduced pressure. The crude product was then purified by re-crystallization from hot ethanol and water to afford 1,4-dihydroquinoline derivatives in high yield. The structures of the products were confirmed from physical and spectroscopic data (IR and  $^1\text{H}$  NMR) in comparison with the literature data.

Table-1 shows the nitrogen adsorption data of (V-TiO<sub>2</sub> and TiO<sub>2</sub> NPs) synthesized nanoparticles. All the nanoparticles exhibited surface area values in between the range of 230–274 m<sup>2</sup>/g. The increasing quantity of vanadium ion doping in TiO<sub>2</sub> lattices (0.1, 0.25, 0.55 and 2.0 at %) somewhat changed the values of surface area. Up to 0.55 at %, the value of surface area was found to be increased slightly and then decreased to 237 m<sup>2</sup>/g. At minimum quantity of doping

(0.1–0.55 at %), vanadium ion might have been incorporated in the titania lattice. It also observed to have controlled the nucleation, growth, and aggregation of titania nanoparticles which facilitated the formation of more number of mesoporous relative to vanadium incorporated titania nanoparticles. On further increase of dopant concentration upto 2.0 at %, amorphous  $\text{VO}_x$  species might have partially blocked the pores which led to decreased pore volume and surface area values. This experience is also compared with already existed reported data.

**Table 1:** Nitrogen adsorption data of V-TiO<sub>2</sub> nanoparticles

| Type of the nano catalyst | BET Surface area (m <sup>2</sup> /g) | Total pore Vol. (mL/g) | Micro pore Vol. (mL/g) |
|---------------------------|--------------------------------------|------------------------|------------------------|
| Bare TiO <sub>2</sub>     | 230.4                                | 0.4                    | 0.05                   |
| 0.1 VT                    | 234.6                                | 0.4                    | 0.05                   |
| 0.25 VT                   | 239.1                                | 0.4                    | 0.05                   |
| 0.55 VT                   | 274.6                                | 0.5                    | 0.05                   |
| 2.0 VT                    | 237.9                                | 0.4                    | 0.05                   |

XPS data of undoped TiO<sub>2</sub> and doped V-TiO<sub>2</sub> nanoparticles are revealed in Figures 1(a)–(c). TiO<sub>2</sub> sample exhibits two peaks at 459.6 and 464.9 eV, depicting Ti 2p<sub>3/2</sub> and Ti 2p<sub>1/2</sub> peaks (Fig. 1a) corresponding to Ti<sup>+4</sup> oxidation state. In addition to these, binding energies at 523.2 eV and 524.8 eV are also observed which are found to be the characteristics of V<sup>+5</sup> states, respectively indicating peak maxima of V 2p<sub>1/2</sub> and V 2p<sub>3/2</sub> (Fig. 1b). Due to similar radii vanadium ion seemed to be incorporated in TiO<sub>2</sub> lattice by substitutionally replacing some of Ti<sup>4+</sup> ions and formed Ti O V bonds. The Ti 2p peak becomes wide and unsymmetrical after vanadium doping, which might be related to more oxygen defects appeared after vanadium doping. The O 1s peak (Fig. 1c) of the samples is observed at ~ 530 to 532 eV for all the nanoparticles.

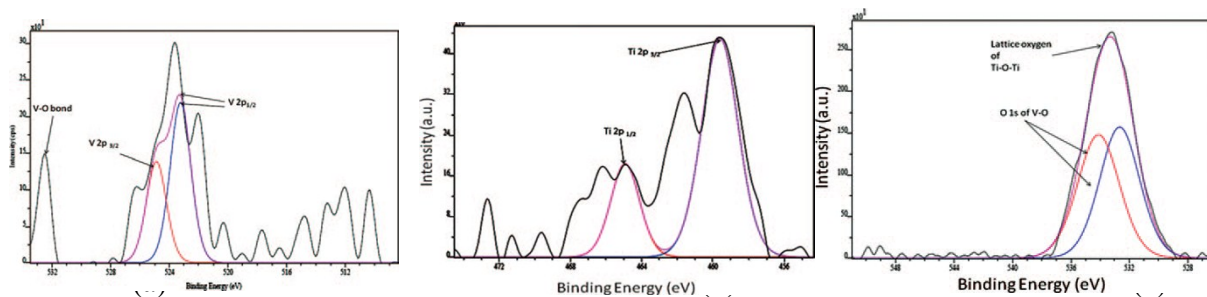

**Figure 1:** XPS data of TiO<sub>2</sub> NPs and 0.1 V-TiO<sub>2</sub> NPs (a-c).

Careful examination of FT-IR data (Figure 2) point towards the occurrence of  $3463\text{ cm}^{-1}$ ,  $3488\text{ cm}^{-1}$  and  $3563\text{ cm}^{-1}$  frequency bands which represented the presence of hydroxyl groups with different environments. These data also indicated the attachment of OH groups to both  $\text{Ti}^{3+}$  and  $\text{Ti}^{4+}$  ions. This observation further indicates the presence of oxygen vacancies in addition to surface hydroxyl groups. Collectively, surface hydroxyl groups, oxygen vacancies, Lewis acid sites, and other defects in V-TiO<sub>2</sub> nanoparticles play major role in the synthesis of polyhydroquinolines *via* Hantzsch hetero-annulation.

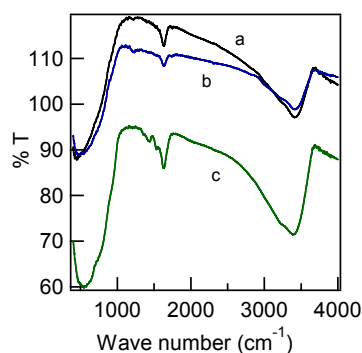

**Figure 2:** FT-IR data of V-TiO<sub>2</sub> nanoparticles.

Energy-dispersive X-ray spectroscopy (EDX) spectrum of undoped nanocrystalline TiO<sub>2</sub> is shown in figure 3. The EDX spectrum reveals the presence of Ti, V and O elements, which confirms that nanoparticle are TiO<sub>2</sub> and V-TiO<sub>2</sub>. Au and C signals could be due to gold coating and carbon film supporting the specimen during SEM observation.

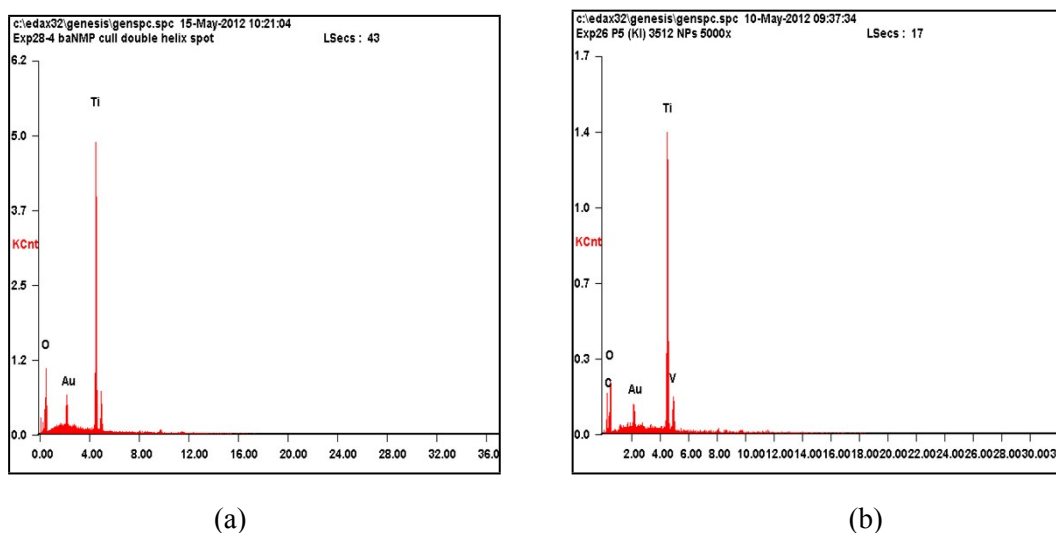

**Figure 3:** EDX data of (a) TiO<sub>2</sub> and (b) V-TiO<sub>2</sub>

**Table 2:**

| Entry | R                                                                                   | R2  | Product code | Product                                                                               |
|-------|-------------------------------------------------------------------------------------|-----|--------------|---------------------------------------------------------------------------------------|
| 1     | 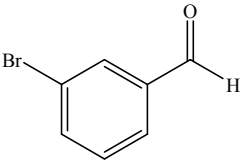   | OEt | 5a           |    |
| 2     |    | OEt | 5b           |    |
| 3     |   | OEt | 5c           |   |
| 4     |  | OEt | 5d           |  |
| 5     |  | OEt | 5e           |  |

|    |                                                                                     |     |    |                                                                                       |
|----|-------------------------------------------------------------------------------------|-----|----|---------------------------------------------------------------------------------------|
| 6  | 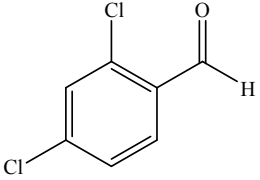   | OEt | 5f |    |
| 7  |    | OEt | 5g |    |
| 8  |    | OEt | 5h |    |
| 9  |   | OEt | 5i |   |
| 10 |  | OEt | 5j |  |
| 11 |  | OEt | 5k |  |

|    |                                                                                     |     |    |                                                                                       |
|----|-------------------------------------------------------------------------------------|-----|----|---------------------------------------------------------------------------------------|
| 12 | 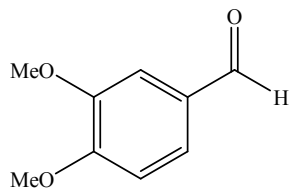   | OEt | 5l |    |
| 13 |    | OEt | 5m |    |
| 14 |    | OEt | 5n |    |
| 15 |   | OEt | 5o |   |
| 16 |  | OEt | 5p |  |
| 17 |  | OEt | 5q |  |

|    |  |     |    |  |
|----|--|-----|----|--|
| 18 |  | OEt | 5r |  |
| 19 |  | OMe | 5s |  |
| 20 |  | OMe | 5t |  |
| 21 |  | OEt | 5u |  |

**1,4,5,6,7,8-Hexahydro-2,7,7-trimethyl-5-oxo-4-(4-methylphenyl)-3-quinolinecarboxyl acid ethyl ester (5b).** IR (KBr): 3290, 2975, 1708, 1636, 1612, 1486, 1375, 1212, 1074, 1032, 872  $\text{cm}^{-1}$ ;  $^1\text{H}$  NMR (400 MHz,  $\text{CDCl}_3$ ):  $\delta$  = 0.94 (s, 3H), 1.07 (s, 3H), 1.24 (t,  $J$  = 7.2 Hz, 3H), 2.16-2.34 (m, 4H), 2.24 (s, 3H), 2.38 (s, 3H), 4.10 (q,  $J$  = 7.1 Hz, 2H), 5.14 (s, 1H), 6.76 (s, 1H), 7.14 (d,  $J$  = 7.9 Hz, 2H), 7.26 (d,  $J$  = 8.0 Hz, 2H);  $^{13}\text{C}$  NMR (100 MHz,  $\text{CDCl}_3$ ):  $\delta$  = 14.25, 19.34, 21.14, 27.32, 29.43, 32.56, 36.22, 40.86, 50.87, 59.76, 106.22, 112.32, 127.90, 128.65, 135.64, 143.54, 144.24, 148.54, 167.58, 194.64.

**Ethyl-1,4,7,8-tetrahydro-2,7,7-trimethyl-4-(4-methoxyphenyl)-5(6H)-oxoquinolin-3-carboxylate (5c).** IR (KBr): 3267, 2965, 1712, 1656, 1622, 1469, 1392, 1202, 1026, 764  $\text{cm}^{-1}$ .  $^1\text{H}$  NMR (400 MHz,  $\text{DMSO}-d_6$ ):  $\delta$  = 0.98 (s, 3H), 1.06 (s, 3H), 1.12 (t,  $J$  = 7.2 Hz, 3H), 2.04-2.18 (m, 4H), 2.28 (s, 3H), 3.76 (s, 3H), 4.10 (q,  $J$  = 7.2 Hz, 2H), 4.76 (s,

1H), 6.56 (d,  $J = 7.3$  Hz, 2H), 7.16 (d,  $J = 7.3$  Hz, 2H), 8.56 (s, 1H).  $^{13}\text{C}$  NMR (100 MHz, DMSO- $d_6$ )  $\delta$  14.13, 18.25, 26.44, 29.16, 32.19, 34.71, 50.24, 50.50, 54.85, 58.98, 103.24, 110.16, 113.08, 113.12, 128.26, 128.33, 139.81, 144.66, 149.13, 157.25, 166.90, 194.28.

**1,4,5,6,7,8-Hexahydro-2,7,7-trimethyl-5-oxo-4-(4-chlorophenyl)-3-quinolinecarboxyl acid ethyl ester (5d).** IR (KBr): 3392, 2976, 1664, 1634, 1469, 1346, 1257, 1058, 1024, 872  $\text{cm}^{-1}$ ;  $^1\text{H}$  NMR (400 MHz,  $\text{CDCl}_3$ ):  $\delta$  = 0.98 (s, 3H), 1.12 (s, 3H), 1.20 (t,  $J = 7.2$  Hz, 3H), 2.09-2.28 (m, 4H), 2.36 (s, 3H), 4.06 (q,  $J = 7.1$  Hz, 2H), 5.12 (s, 1H), 6.32 (s, 1H), 7.23-7.36 (m, 4H), 7.34 (d,  $J = 8.0$  Hz, 2H);  $^{13}\text{C}$  NMR (100 MHz,  $\text{CDCl}_3$ ):  $\delta$  = 14.32, 19.22, 27.24, 29.36, 32.46, 36.32, 40.78, 50.67, 59.74, 105.44, 111.56, 122.46, 129.32, 131.56, 140.43, 147.47, 149.56, 167.76, 195.48.

**1,4,5,6,7,8-Hexahydro-2,7,7-trimethyl-5-oxo-4-(2,4-dichlorophenyl)-3-quinolinecarboxyl acid ethyl ester (5f).** IR (KBr): 3293, 2964, 1723, 1664, 1596, 1486, 1224, 1121, 1076, 854, 754  $\text{cm}^{-1}$ ;  $^1\text{H}$  NMR (400 MHz,  $\text{CDCl}_3$ ):  $\delta$  = 0.98 (s, 3H), 1.01 (s, 3H), 1.24 (t,  $J = 7.1$  Hz, 3H), 2.01-2.27 (m, 4H), 2.24 (s, 3H), 4.07 (m, 2H), 5.28 (s, 1H), 6.93 (s, 1H), 7.11-7.36 (m, 3H);  $^{13}\text{C}$  NMR (100 MHz,  $\text{CDCl}_3$ ):  $\delta$  = 14.32, 19.22, 27.32, 29.43, 32.38, 35.76, 40.95, 50.86, 59.82, 104.64, 110.75, 126.76, 129.34, 129.54, 132.12, 132.93, 133.76, 142.83, 144.24, 149.30, 167.43, 195.29.

**Ethyl-1,4,7,8-tetrahydro-2,7,7-trimethyl-4-(2-chlorophenyl)-5(6H)-oxoquinolin-3-carboxylate (5g).** IR (KBr): 3063, 2956, 1721, 1640, 1611, 1467, 1384, 1227, 1021, 745  $\text{cm}^{-1}$ .  $^1\text{H}$  NMR (400 MHz, DMSO- $d_6$ ):  $\delta$  = 0.92 (s, 3H), 1.06 (s, 3H), 1.24 (t,  $J = 7.2$  Hz, 3H), 2.12-2.32 (m, 4H), 2.42 (s, 3H), 4.12 (q,  $J = 7.2$  Hz, 2H), 4.54 (s, 1H), 7.10-7.24 (m, 4H), 7.34 (s, 1H).  $^{13}\text{C}$  NMR (100 MHz, DMSO- $d_6$ )  $\delta$  26.52, 29.13, 31.28, 32.23, 42.64, 46.85, 48.92, 50.54, 52.97, 55.15, 101.32, 109.25, 114.28, 125.91, 127.16, 128.72, 131.13, 132.38, 141.02, 167.52, 195.71.

**Ethyl 2,7,7-trimethyl-4-(3-nitrophenyl)-5-oxo-1,4,5,6,7,8-hexahydroquinoline-3-carboxylate (5j):** IR (KBr): 3274, 2946, 1732, 1678, 1642, 1475, 1362, 1216, 1032, 772  $\text{cm}^{-1}$ .  $^1\text{H}$  NMR (400 MHz,  $\text{CDCl}_3$ ):  $\delta$  = 0.92 (s, 3H), 1.04 (s, 3H), 1.23 (t,  $J = 7.1$  Hz, 3H), 2.14-2.38 (m, 7H), 3.72 (q,  $J = 7.1$  Hz, 2H), 5.24 (s, 1H), 6.87 (s, 1H), 7.42 (t,  $J = 7.9$  Hz, 1H), 7.76 (d,  $J = 7.9$  Hz, 1H), 7.86 (m, 1H), 7.92 (m, 1H).  $^{13}\text{C}$  NMR (100 MHz,  $\text{CDCl}_3$ ):  $\delta$  = 12.86, 18.12, 25.84, 28.17, 31.52, 35.78, 39.53, 49.35, 58.85, 103.78, 109.82, 119.46, 121.75, 127.63, 133.95, 143.24, 146.79, 148.61, 165.73, 194.44.

**Ethyl-1,4,7,8-tetrahydro-2,7,7-trimethyl-4-(4-fluorophenyl)-5(6H)-oxoquinolin-3-carboxylate (5k).** IR (KBr): 3298, 2965, 1686, 1654, 1612, 1476, 1376, 1222, 1034, 762  $\text{cm}^{-1}$ .  $^1\text{H}$  NMR (400 MHz,  $\text{CDCl}_3$ ):  $\delta$  = 0.96 (s, 3H), 1.08 (s, 3H), 1.14 (t,  $J = 7.3$  Hz, 3H), 2.08-2.28 (m, 4H), 2.42 (s, 3H), 4.12 (q,  $J = 7.33$  Hz, 2H), 5.24 (s, 1H), 5.76

(s, 1H), 6.74-6.88 (m, 2H), 7.18 -7.26 (m, 2H). <sup>13</sup>C NMR (100 MHz, CDCl<sub>3</sub>) δ 14.16, 18.28, 26.42, 29.08, 32.14, 35.26, 50.14, 50.38, 59.03, 103.42, 110.08, 114.22, 114.31, 114.43, 129.08, 129.16, 144.11, 145.14, 149.46, 169.82, 194.29.

***Ethyl-1,4,7,8-tetrahydro-2,7,7-trimethyl-4-(3,4-dimethoxyphenyl)-5(6H)-oxoquinolin-3-carboxylate (5l).*** IR (KBr): 3243, 2959, 1686, 1648, 1616, 1476, 1373, 1216, 1046, 772 cm<sup>-1</sup>. <sup>1</sup>H NMR: (400 MHz, CDCl<sub>3</sub>) δ = 0.94 (s, 3H), 1.06 (s, 3H), 1.24 (t, *J* = 7.3 Hz, 3H), 2.10-2.25 (m, 4H), 2.32 (s, 3H), 3.76 (s, 3H), 3.80 (s, 3H) 4.06 (q, *J* = 7.3 Hz, 2H), 5.12 (s, 1H), 5.78 (s, 1H, NH), 6.68 (d, *J* = 8.30 Hz, 1H), 6.72 (dd, *J* = 8.32 and 1.94 Hz, 1H), 6.78 (d, *J* = 1.96 Hz, 1H). <sup>13</sup>C NMR (100 MHz, CDCl<sub>3</sub>) δ 14.26, 18.23, 26.48, 29.12, 32.07, 35.03, 50.26, 50.58, 55.23, 55.38, 59.06, 103.82, 110.15, 111.47, 111.79, 119.24, 140.42, 144.56, 146.90, 147.92, 149.44, 166.96, 194.34.

***Ethyl-1,4,7,8-tetrahydro-2,7,7-trimethyl-4-(4-hydroxy-3-methoxyphenyl)-5(6H)-oxoquinolin-3-carboxylate (5p).*** IR (KBr): 3368, 2946, 1698, 1634, 1586, 1476, 1365, 1234, 1058, 792 cm<sup>-1</sup>. <sup>1</sup>H NMR (400 MHz, DMSO-d<sub>6</sub>) : δ = 0.96 (s, 3H), 1.05 (s, 3H), 1.26 (t, *J* = 7.2 Hz, 3H), 2.08-2.24 (m, 4H), 2.36 (s, 3H), 3.78 (s, 3H), 4.45 (q, *J* = 7.2 Hz, 2H), 4.86 (s, 1H), 6.72 (s, 2H), 6.84 (s, 1H), 7.86 (s, 1H), 8.54 (s, 1H). <sup>13</sup>C NMR (100 MHz, DMSO-d<sub>6</sub>) δ 14.25, 18.24, 26.33, 29.20, 32.18, 35.04, 50.28, 55.42, 58.97, 104.08, 110.14, 112.02, 114.95, 119.36, 119.57, 139.08, 144.34, 144.57, 146.72, 149.26, 167.08, 194.34.

***1,4,5,6,7,8-Hexahydro-2,7,7-trimethyl-5-oxo-4-(4-bromophenyl)-3-quinolinecarboxyl acid ethyl ester (5r).*** IR (KBr): 3288, 2980, 1716, 1662, 1602, 1465, 1254, 1226, 1076, 1027, 868 cm<sup>-1</sup>; <sup>1</sup>H NMR (400 MHz, CDCl<sub>3</sub>): δ = 0.94 (s, 3H), 1.04 (s, 3H), 1.21 (t, *J* = 7.2 Hz, 3H), 2.08-2.26 (m, 4H), 2.32 (s, 3H), 4.16 (q, *J* = 7.1 Hz, 2H), 5.24 (s, 1H), 6.56 (s, 1H), 6.98 (d, *J* = 7.9 Hz, 2H), 7.18 (d, *J* = 8.0 Hz, 2H); <sup>13</sup>C NMR (100 MHz, CDCl<sub>3</sub>): δ = 14.22, 19.23, 27.41, 29.14, 32.76, 36.54, 41.16, 50.67, 59.78, 105.58, 111.78, 119.54, 129.68, 130.60, 143.77, 146.51, 148.56, 167.22, 195.32.

***1,4,5,6,7,8-Hexahydro-2,7,7-trimethyl-5-oxo-4-(3-bromophenyl)-3-quinolinecarboxyl acid ethyl ester (5u).*** IR (KBr): 3286, 2946, 1698, 1634, 1620, 1486, 1456, 1222, 1082, 1074, 1043, 787 cm<sup>-1</sup>; <sup>1</sup>H NMR (400 MHz, CDCl<sub>3</sub>): δ = 0.98 (s, 3H), 1.12 (s, 3H), 1.32 (t, *J* = 7.2 Hz, 3H), 2.08-2.28 (m, 4H), 2.43 (s, 3H), 4.26-4.38 (m, 2H), 5.12 (s, 1H), 7.23 (s, 1H), 7.10-7.44 (m, 4H), 7.56 (d, *J* = 8.0 Hz, 2H); <sup>13</sup>C NMR (100 MHz, CDCl<sub>3</sub>): δ = 14.32, 19.32, 27.54, 29.44, 32.76, 36.75, 40.86, 50.74, 59.73, 105.43, 111.38, 122.16, 126.98, 129.32, 129.44, 131.21, 144.12, 149.35, 149.43, 167.28, 195.56.
